# Supplementary material for: TRF-Val-CAC-016 Modulates the Transduction of CACNA1d-Mediated MAPK Signaling Pathways to Suppress the Proliferation of Gastric Carcinoma
Source: Research Square preprint supplement (doi:10.21203/rs.3.rs-1204437/v1), 2022-01-06
Supplement: Supplementary file 1 [file 3e7e2bbf5b8b98d4d5d0809c.docx]

**Supplementary Table 1 Information of antibodies for Western blot, immunofluorescence staining and IHC.**

| **Antibody** | **Manufacturer** | **Item NO.** | **Species** | **Dilution (primary)** |
| --- | --- | --- | --- | --- |
| CACNA1d | abcam | Ab84811 | Mouse | 1: 1000 |
| ERK1/2 | Servicebio | GB11560 | Rabbit | 1: 1000 |
| p-ERK1/2 | CST | 4370 | Rabbit | 1: 1000 |
| JNK | proteintech | 24164-1-AP | Rabbit | 1: 1000 |
| p-JNK | CST | 4668 | Rabbit | 1: 1000 |
| p38 | abcam | ab32142 | Rabbit | 1: 1000 |
| p-p38 | CST | 4511 | Rabbit | 1: 1000 |
| c-Myc | proteintech | 10828-1-AP | Rabbit | 1: 1000 |
| CyclinB | abcam | ab185622 | Rabbit | 1: 1000 |
| CyclinD1 | proteintech | 60186-1-LG | Mouse | 1: 1000 |
| Ki67 | abcam | ab16667 | Rabbit | 1: 200 |
| β-actin | Servicebio | GB12001 | Mouse | 1: 1000 |
