# Supplementary material for: TRF-Val-CAC-016 Modulates the Transduction of CACNA1d-Mediated MAPK Signaling Pathways to Suppress the Proliferation of Gastric Carcinoma
Source: Research Square preprint supplement (doi:10.21203/rs.3.rs-1204437/v1), 2022-01-06
Supplement: Supplementary file 2 [file b1be7aee84997748535ce0a4.docx]

**Supplementary Table 2 The sequence of siRNAs and tRF mimics.**

| **Names** | **Sequence (5’-3’)** |
| --- | --- |
| tRF-Val-CAC-016 mimics | AAGTGGTTCCCGTTT |
| CACNA1d-F | TTCCCTCAAGCACTTCTCACAG |
| CACNA1d-R | GCCATCGTACATCACAGCATTC |
| si-CACNA1d-1 | CGAAGAGCCTGCATTAGTA |
| si-CACNA1d-2 | GAACGGATCTGGCAAAACA |
| si-CACNA1d-3 | GGGAAGTTCTATCGCTGTA |
| U6-F | CTCGCTTCGGCAGCACA |
| U6-R | AACGCTTCACGAATTTGCGT |
| GAPDH-F | ACCCACTCCTCCACCTTTGAC |
| GAPDH-R | TGTTGCTGTAGCCAAATTCGTT |

**Note** F, forward, R, reverse. The sequence information of all siRNA controls, ASO controls, miRNA primers, and probes is not public according to the declaration of RiboBio (Guangzhou, China).
